# Supplementary material for: Pyridine-2,6-Dithiocarboxylic Acid and Its Metal Complexes: New Inhibitors of New Delhi Metallo β-Lactamase-1
Source: PubMed Central journal article supplement (PMC7374359; doi:10.3390/md18060295), 2020-06-02
Supplement: marinedrugs-18-00295-s001.pdf [file marinedrugs-18-00295-s001.pdf]

## Supporting Information

### **Pyridine-2,6-dithiocarboxylic Acid and Its Metal Complexes: New Inhibitors of New Delhi Metallo $\beta$ -lactamase-1**

Chris S. Thomas,<sup>a</sup> Doug R. Braun,<sup>a</sup> Jose Luis Olmos, Jr.,<sup>b</sup> Scott R. Rajski,<sup>a</sup> George N. Phillips,  
Jr.,<sup>b,c</sup> David Andes,<sup>d</sup> and Tim S. Bugni<sup>a,\*</sup>

<sup>a</sup>Pharmaceutical Sciences Division, School of Pharmacy University of Wisconsin-Madison,  
Madison, Wisconsin 53705, USA

<sup>b</sup>Department of Biosciences, Rice University, Houston, Texas 77005, USA

<sup>c</sup>Department of Chemistry, Rice University, Houston, Texas 77005, USA

<sup>d</sup>Department of Medicine, University of Wisconsin School of Medicine and Public Health,  
Madison, Wisconsin 53705, USA

## Table of Contents

| Item Name        | Contents/Description                                                     | Page |
|------------------|--------------------------------------------------------------------------|------|
| <b>Figure S1</b> | <sup>1</sup> H NMR spectrum and integration of synthetic PDTC            | S3   |
| <b>Figure S2</b> | Rate of CENTA hydrolysis in presence of PDTC alone                       | S3   |
| <b>Figure S3</b> | Mass Spectra of the PDTC with ZnSO <sub>4</sub>                          | S4   |
| <b>Figure S4</b> | Rate of CENTA hydrolysis by NDM-1 in assay buffer with ZnSO <sub>4</sub> | S4   |
| <b>Figure S5</b> | Rate of CENTA hydrolysis by NDM-1 in ZnSO <sub>4</sub> and EDTA          | S4   |
| <b>Figure S6</b> | Mass Spectra of the PDTC complexes collected in ESI (-) mode             | S5   |
| <b>Table S1</b>  | PDTC complex and PDTC MIC data*                                          | S6   |
| <b>Table S2</b>  | Metal salt MIC data*                                                     | S6   |
| <b>Table S3</b>  | Meropenem MIC data with metal salts*                                     | S6   |

\* Organisms tested: *E. coli* 2692, *E. coli* BAA-2452, and *K. pneumoniae* BAA-2146

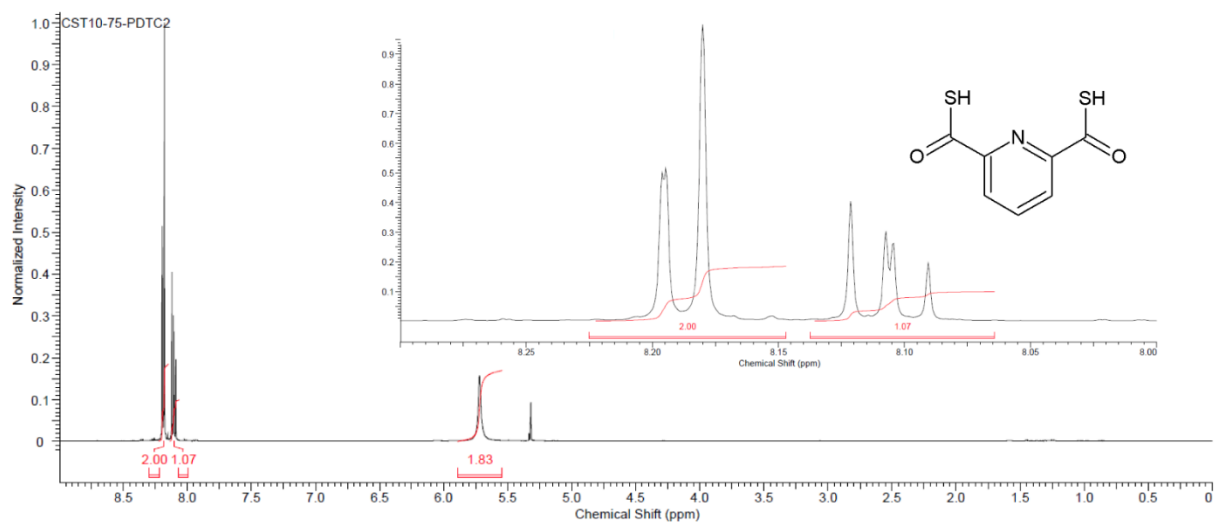

**Figure S1.** <sup>1</sup>H NMR spectrum and integration of synthesized PDTC. Inset expands the region between 8 and 8.3 ppm to highlight the second order coupling pattern – pattern identified as AB<sub>2</sub>.

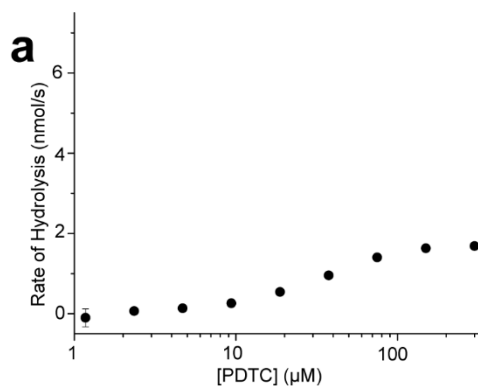

**Figure S2.** Rate of CENTA hydrolysis in the presence of PDTC with no NDM-1.

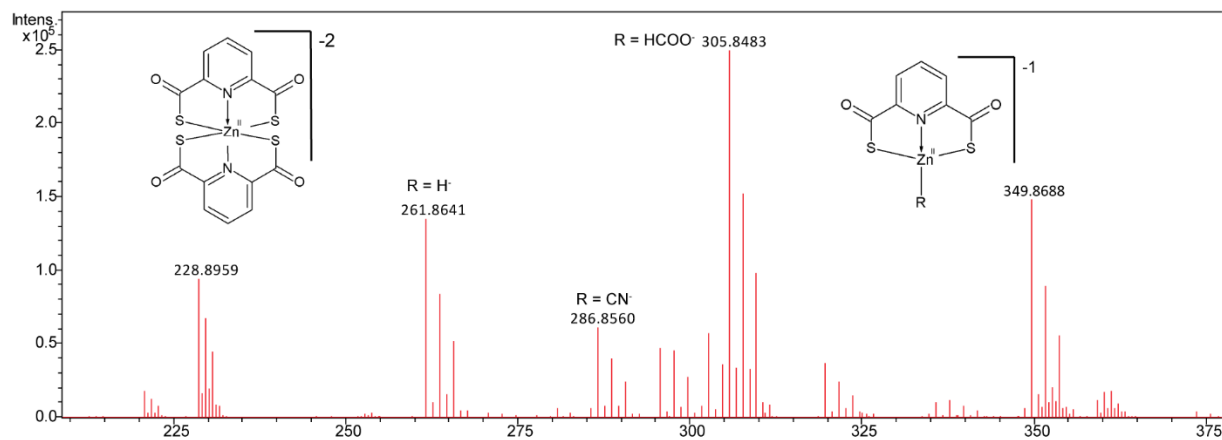

**Figure S3.** Mass spectra acquired for PDTC in the presence of  $\text{ZnSO}_4$ , revealing a 2:1 PDTC<sub>2</sub>-Zn complex for 228.8959 m/z  $[\text{M}-2\text{H}]^{-2}$ . Several 1:1 PDTC-Zn complexes were identified where able.

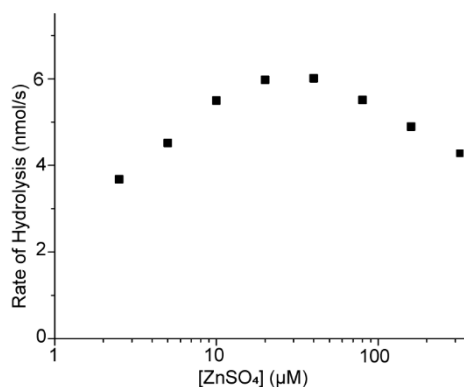

**Figure S4.** Rate of CENTA hydrolysis by NDM-1 at different concentrations of  $\text{ZnSO}_4$  in the assay buffer. Optimal rate of hydrolysis takes place between 20 and 40  $\mu\text{M}$ .

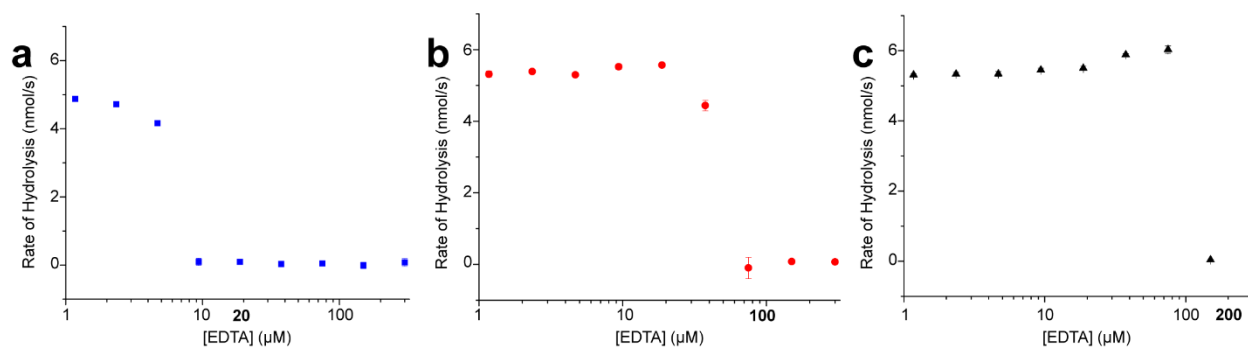

**Figure S5.** Initial rates of CENTA hydrolysis by NDM-1 vs. EDTA concentration with (a) 10  $\mu\text{M}$   $\text{ZnSO}_4$ , (b) 50  $\mu\text{M}$   $\text{ZnSO}_4$ , (c) 100  $\mu\text{M}$   $\text{ZnSO}_4$  supplementing the reaction buffer. EDTA eliminates in a 1:1 equivalency with the amount of  $\text{ZnSO}_4$  incorporated, as compared with PDTC, which reduced activity at 2 equiv. of  $\text{ZnSO}_4$  (denoted by bold type on x axis).

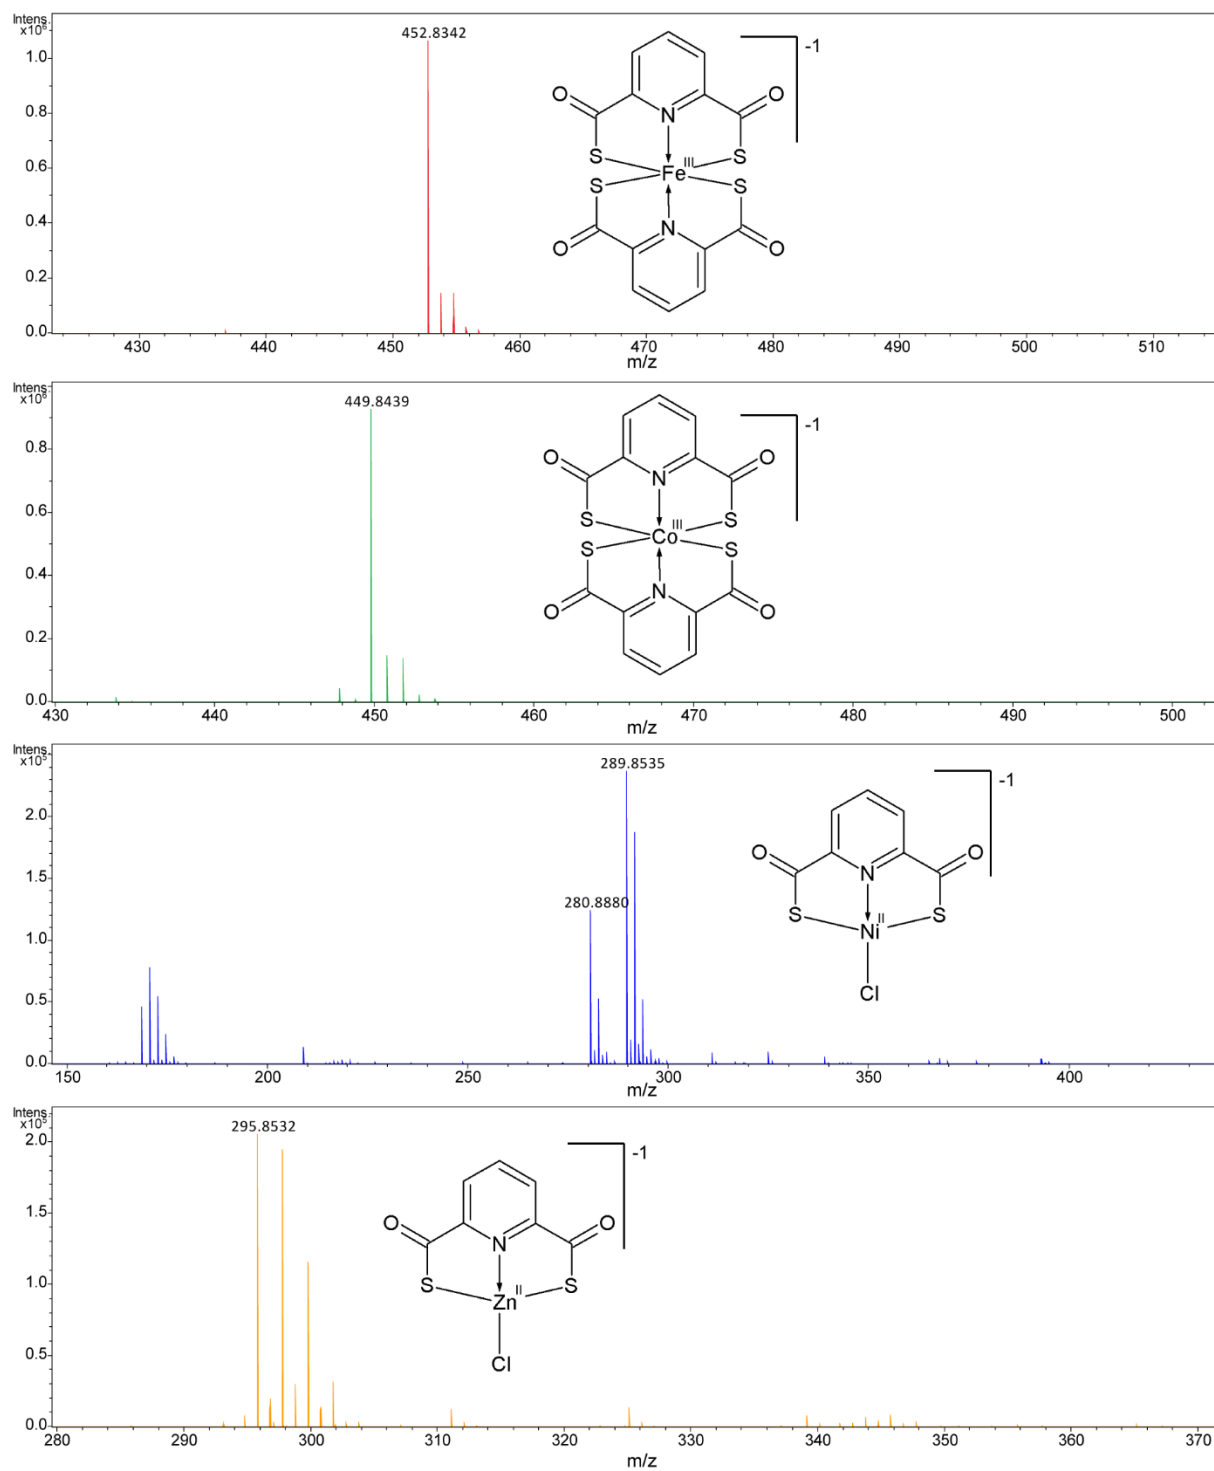

**Figure S6.** Mass Spectra of the PDTC complexes collected in ESI (-) mode.

**Table S1.** PDTC complex and PDTC MIC data. MICs shown are an average of 4 replicates.

|                       | Observed MIC (mM)   |                         |                               |
|-----------------------|---------------------|-------------------------|-------------------------------|
|                       | <i>E. coli</i> 2692 | <i>E. coli</i> BAA-2452 | <i>K. pneumoniae</i> BAA-2146 |
| PDTC <sub>2</sub> -Fe | >1.6                | >1.6                    | 1.6                           |
| PDTC <sub>2</sub> -Co | >1.6                | >1.6                    | 1.6                           |
| PDTC-Ni               | >1.6                | >1.6                    | 1.6                           |
| PDTC-Zn               | 0.2                 | 0.2                     | 0.4                           |
| PDTC (no metal)       | 0.4                 | 0.4                     | 0.4                           |

**Table S2.** Metal salt MIC data. MICs shown are an average of 4 replicates.

|                   | Observed MIC (mM)   |                         |                               |
|-------------------|---------------------|-------------------------|-------------------------------|
|                   | <i>E. coli</i> 2692 | <i>E. coli</i> BAA-2452 | <i>K. pneumoniae</i> BAA-2146 |
| ZnCl <sub>2</sub> | > 1.6               | > 1.6                   | 1.6                           |
| FeCl <sub>3</sub> | > 1.6               | > 1.6                   | > 1.6                         |
| NiCl <sub>2</sub> | > 1.6               | > 1.6                   | > 1.6                         |
| CoCl <sub>2</sub> | 1.6                 | > 1.6                   | 1.6                           |

**Table S3.** Meropenem MIC data with metal salts. MICs shown are an average of 4 replicates.

|                   | Observed Meropenem MIC (µg/mL) |                         |                               |
|-------------------|--------------------------------|-------------------------|-------------------------------|
|                   | <i>E. coli</i> 2692            | <i>E. coli</i> BAA-2452 | <i>K. pneumoniae</i> BAA-2146 |
| (no salt)         | 64                             | 16                      | 128                           |
| ZnCl <sub>2</sub> | 64                             | 32                      | 128                           |
| FeCl <sub>3</sub> | 64                             | 8                       | 128                           |
| NiCl <sub>2</sub> | 64                             | 32                      | 128                           |
| CoCl <sub>2</sub> | 64                             | 10                      | 64                            |

Metal salts were screened at a constant concentration of 400 µM, equivalent to 0.25 x MIC or the highest concentration tested for Table S2
